# Supplementary material
Source: PubMed Central journal article supplement (PMC5693695)

Figure S1

A

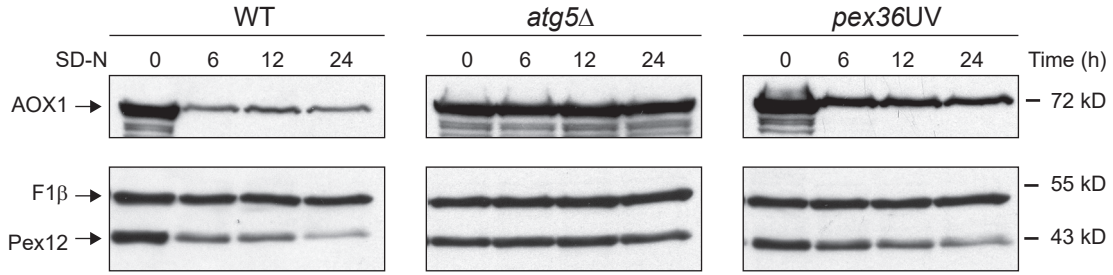

B

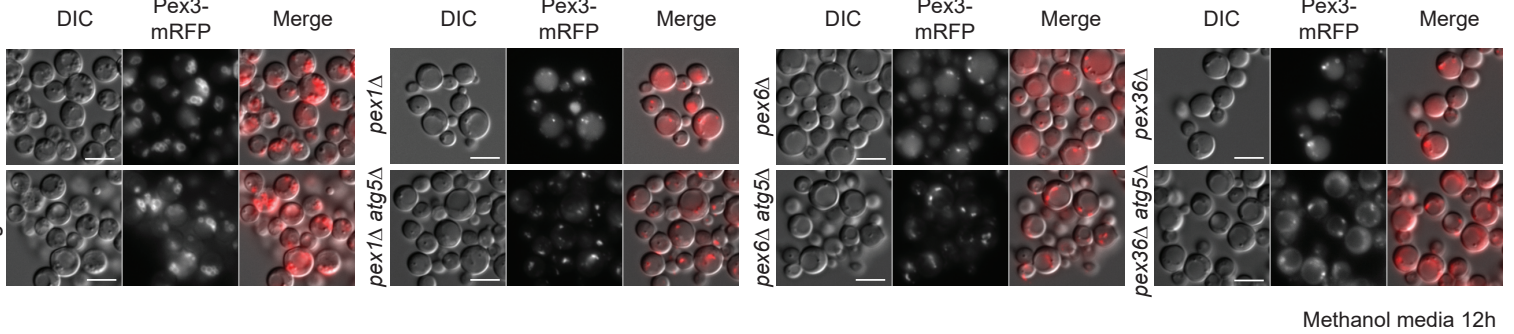

C

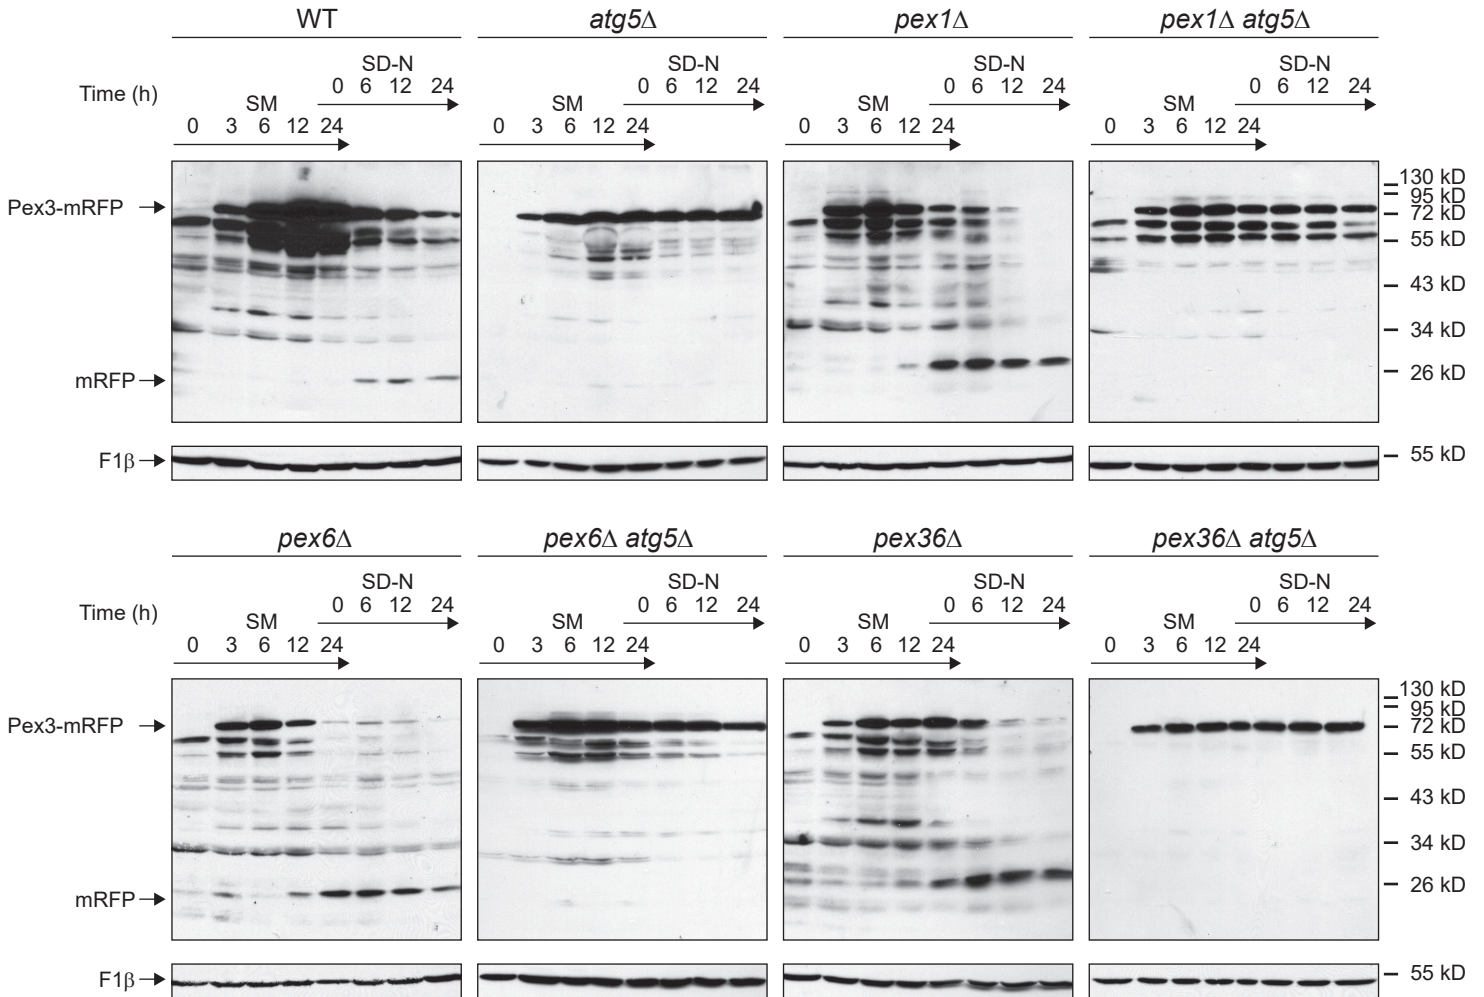

Figure S2

A

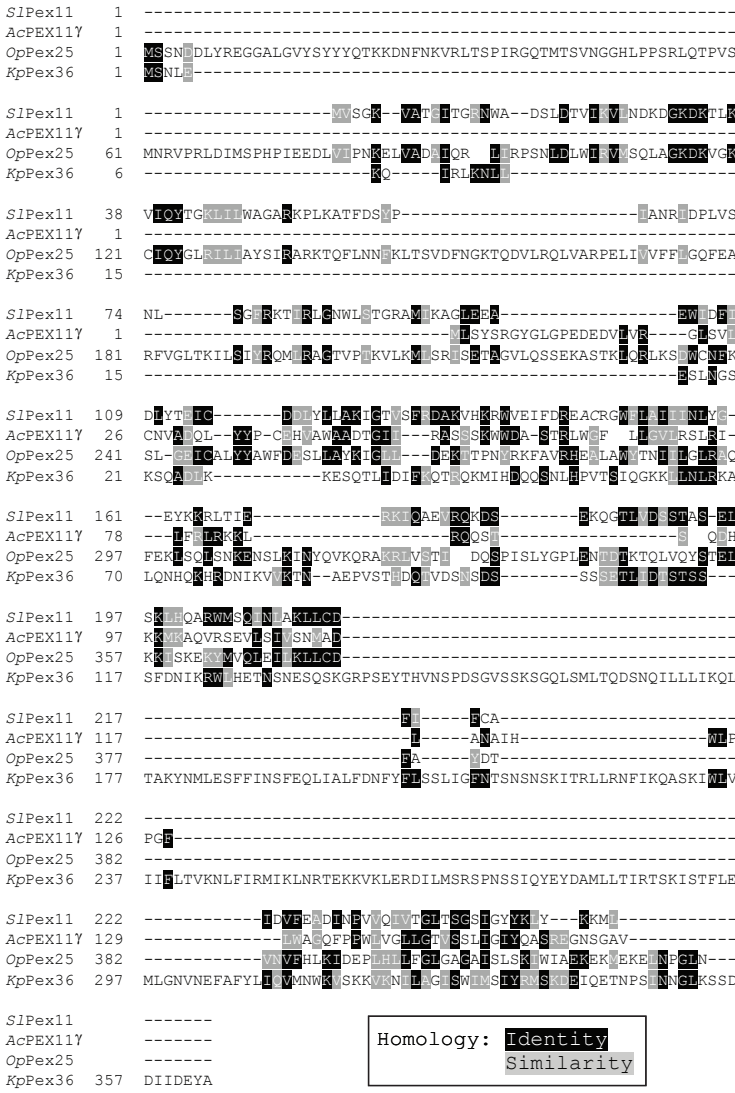

C

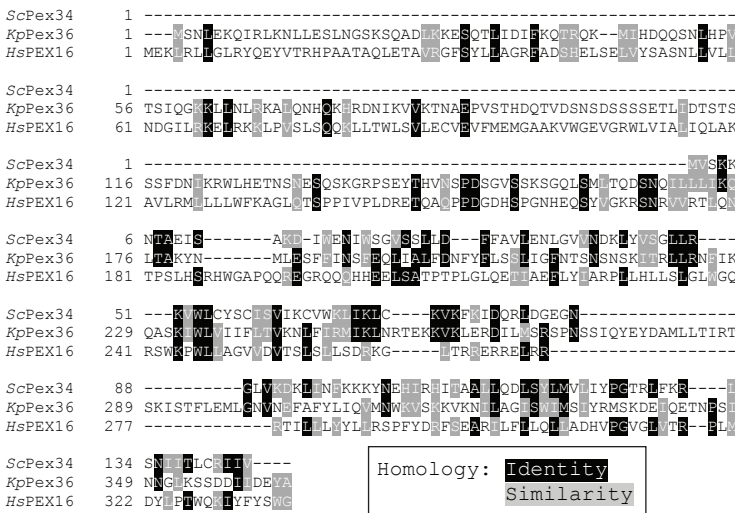

B

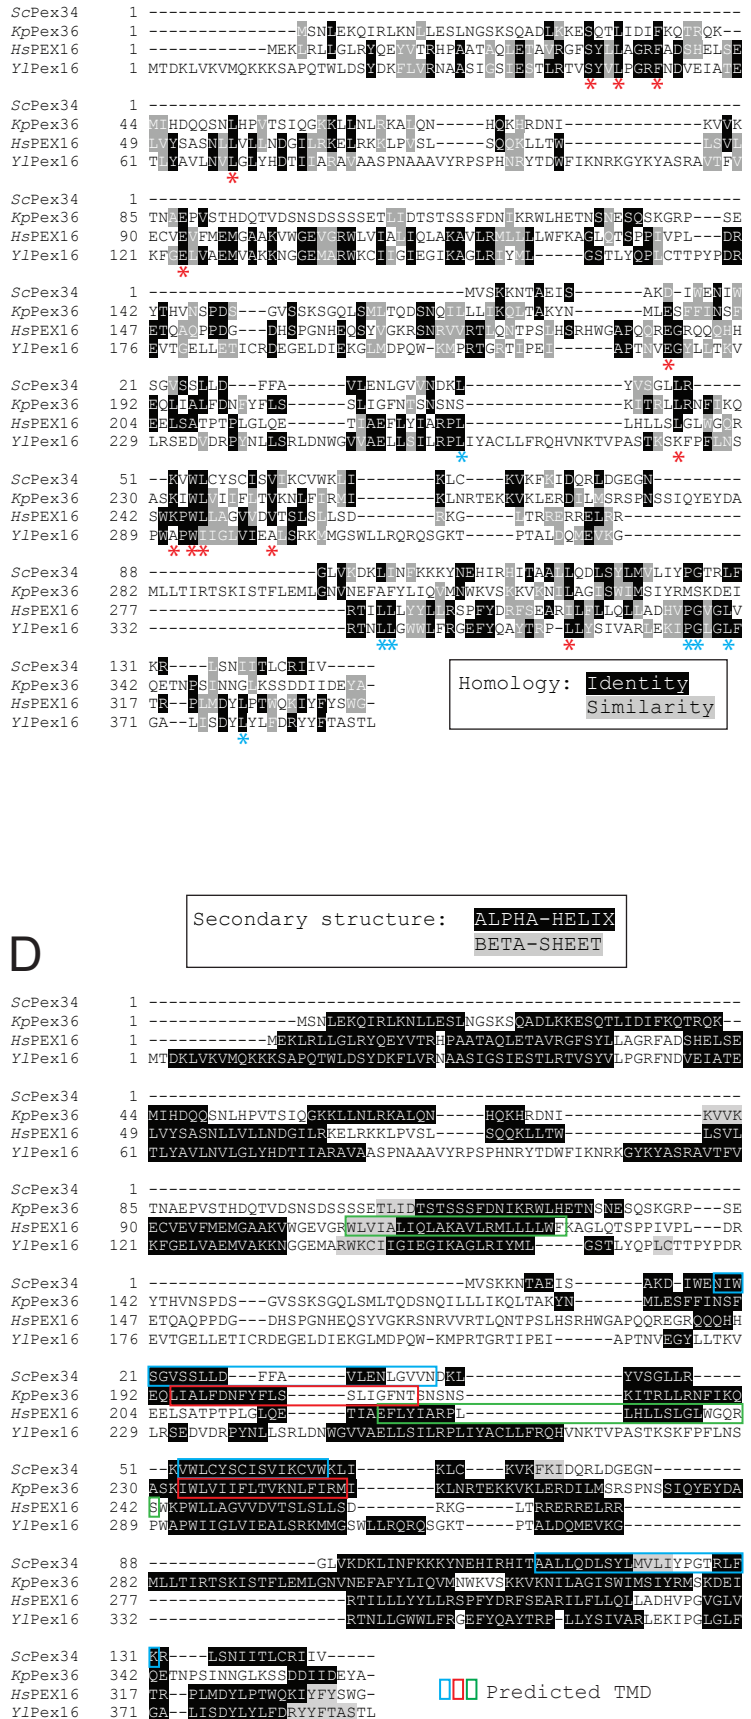



Figure S4

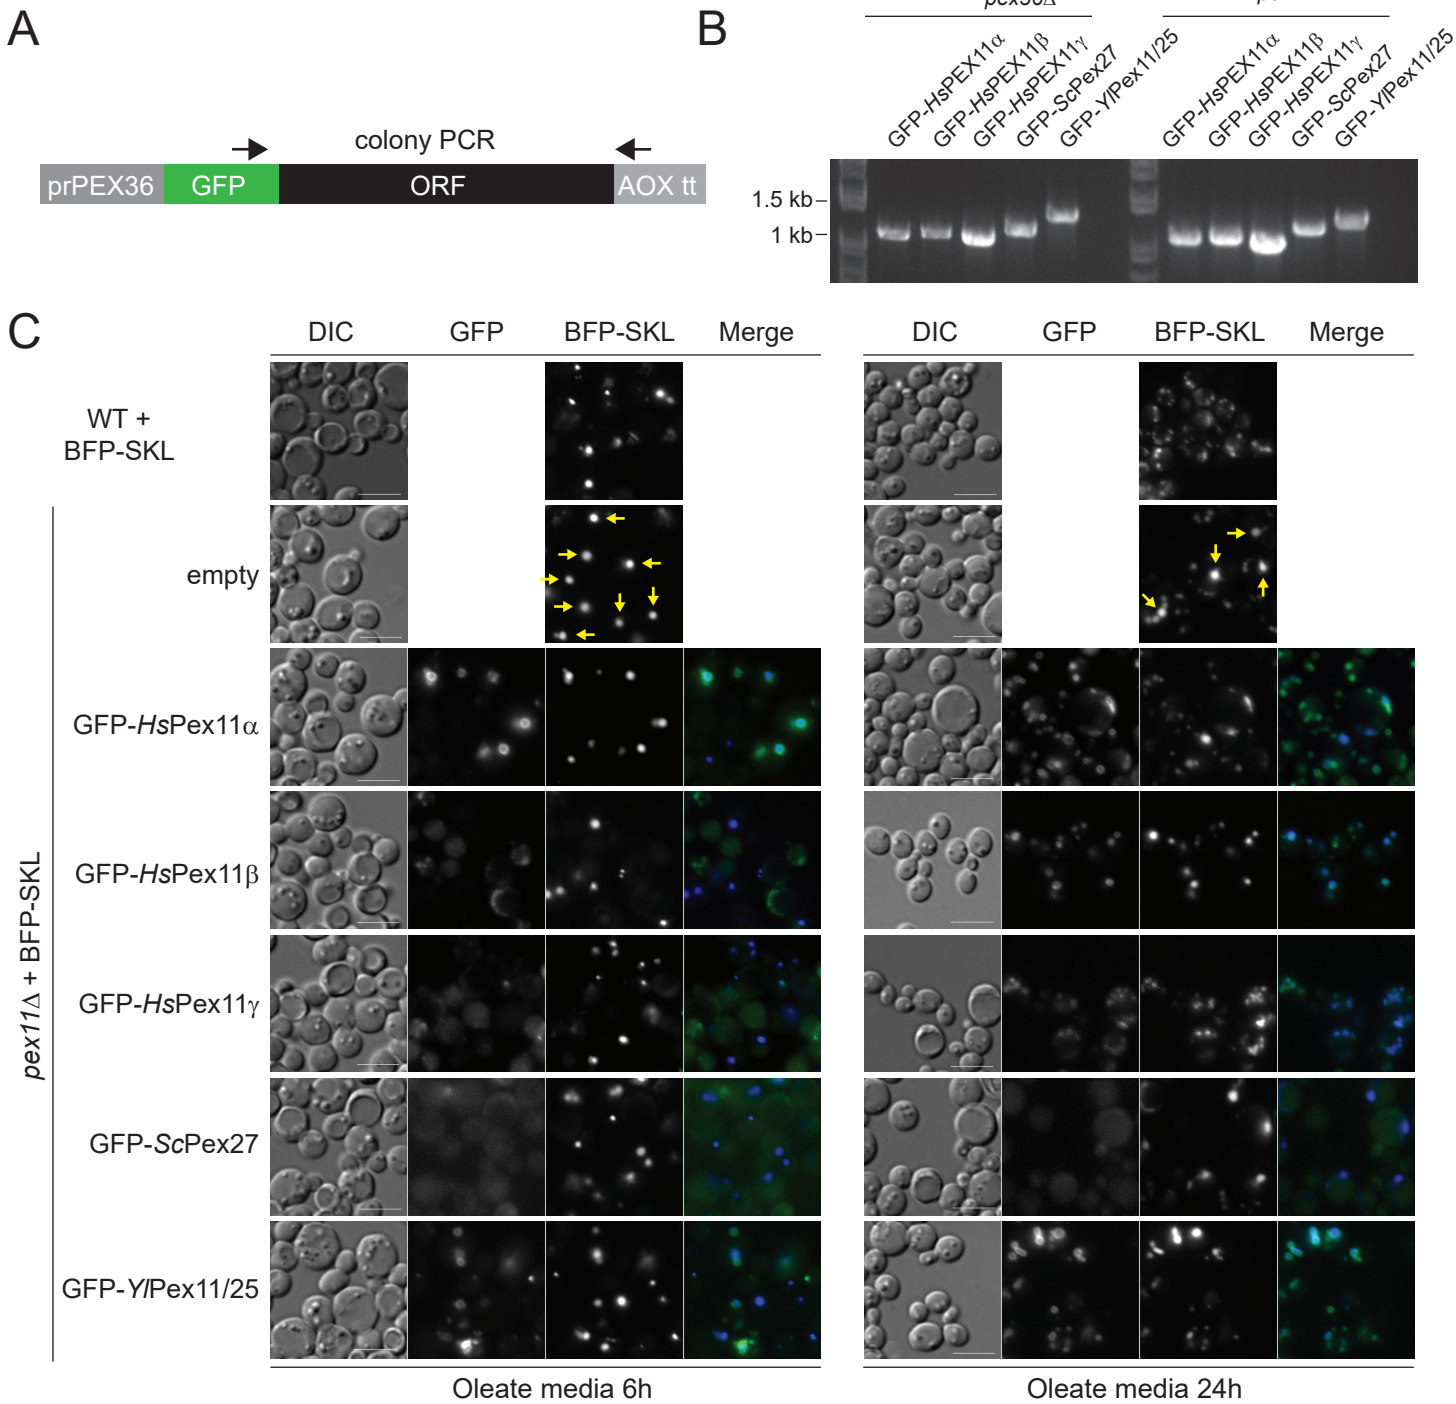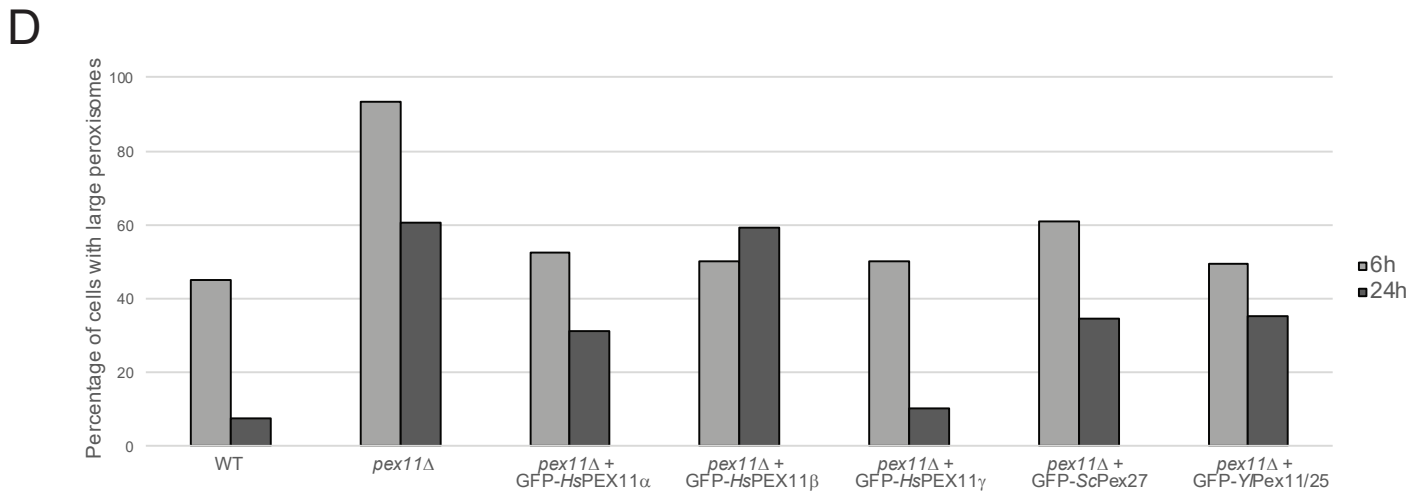

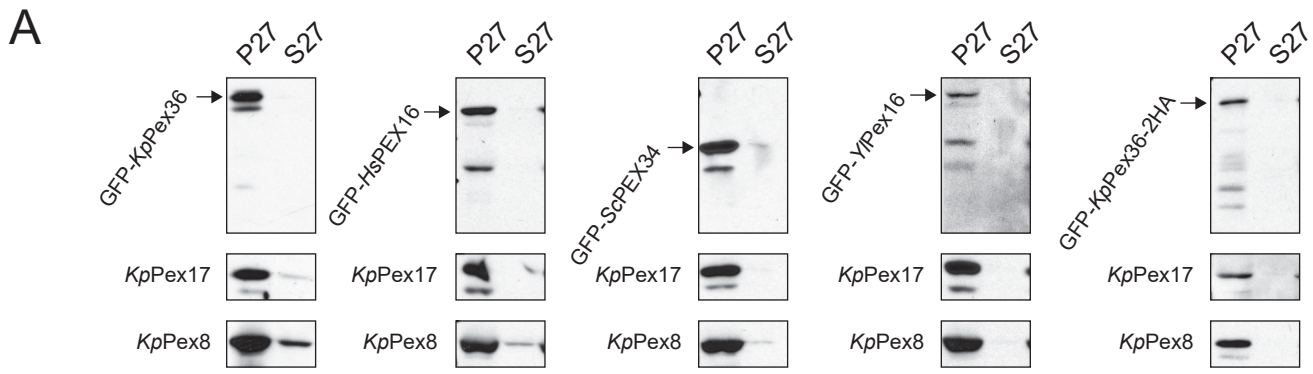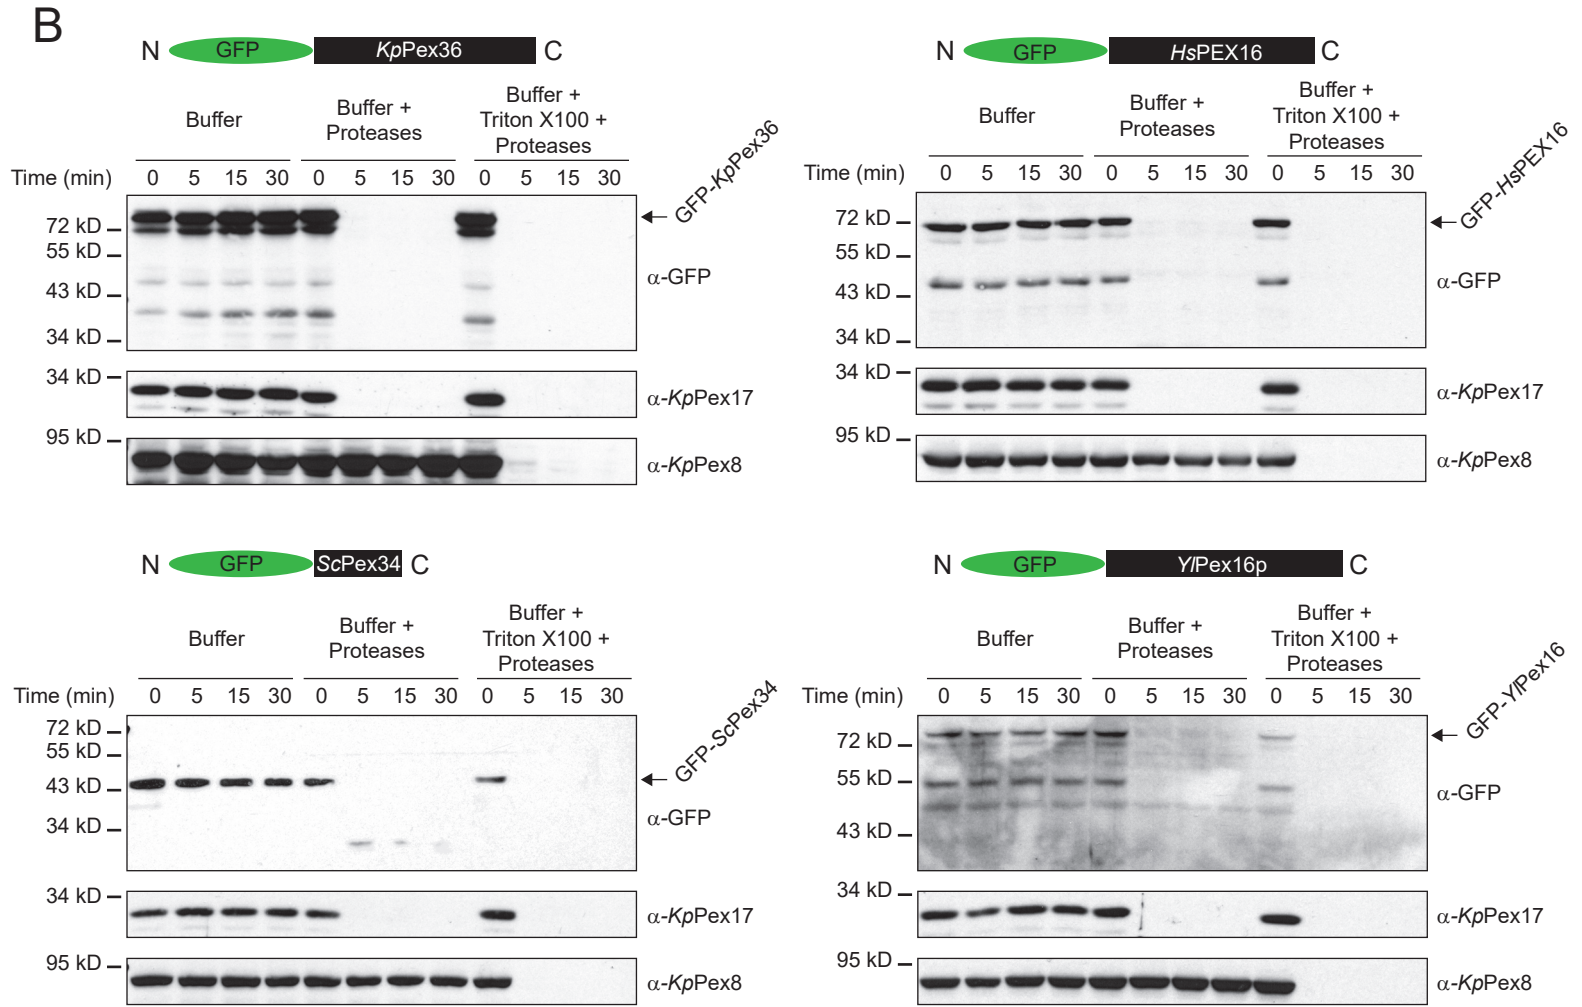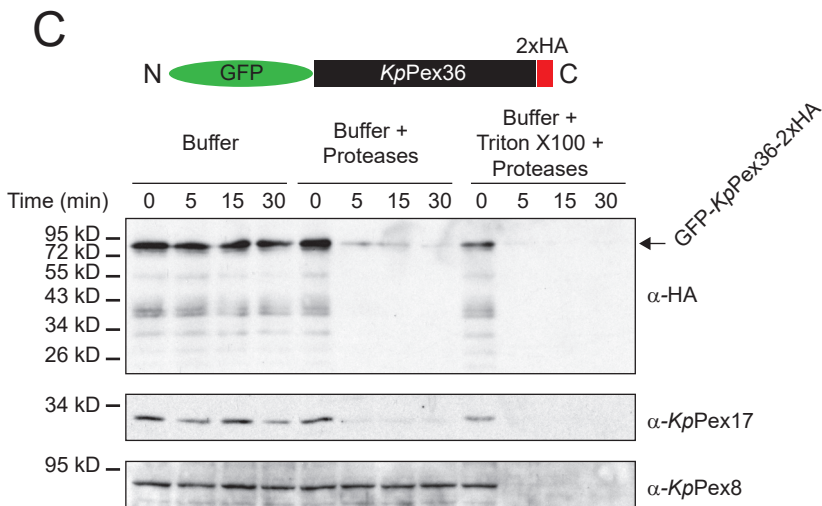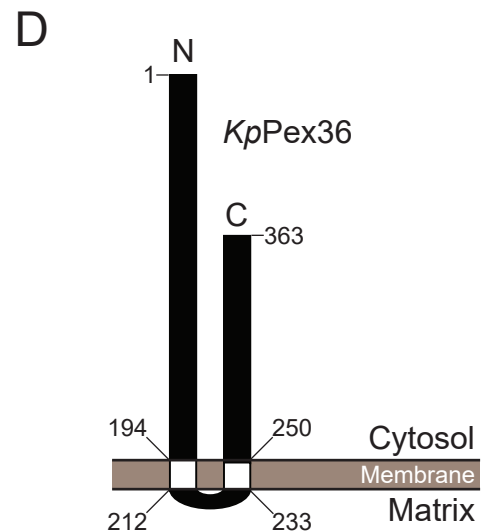

Figure S5

Figure S6

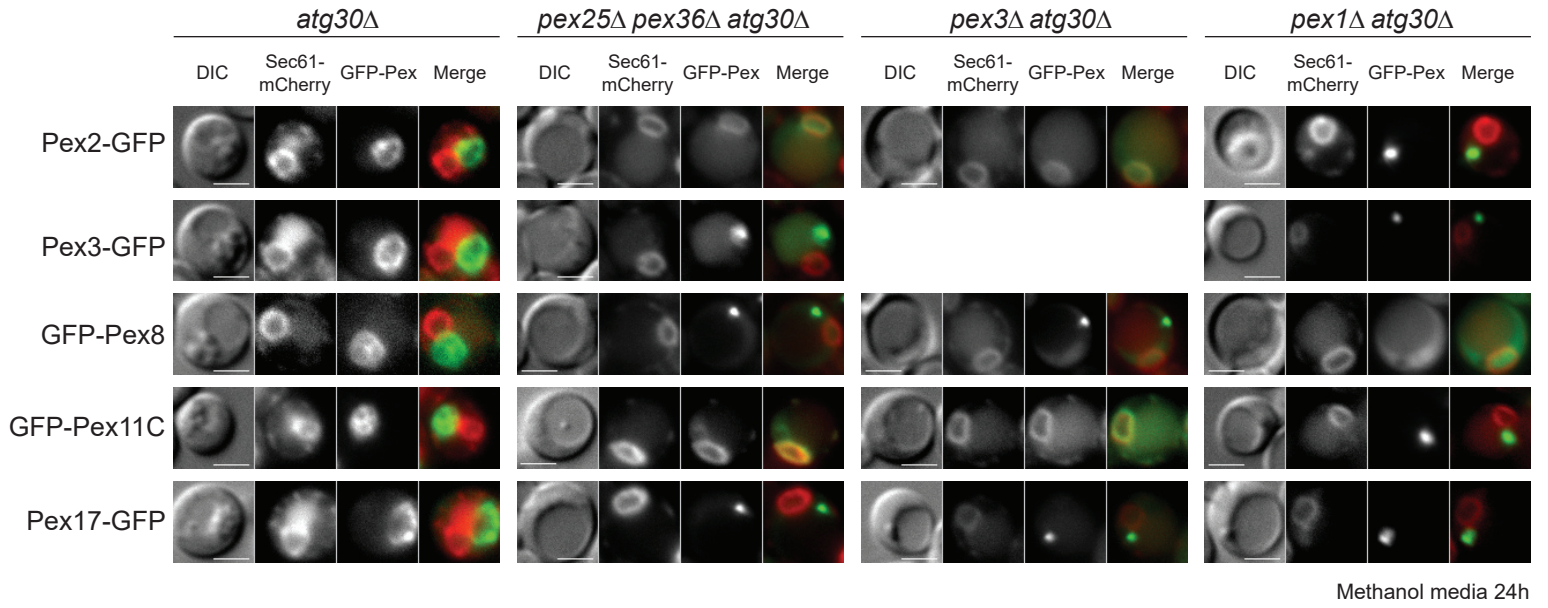

Figure S7

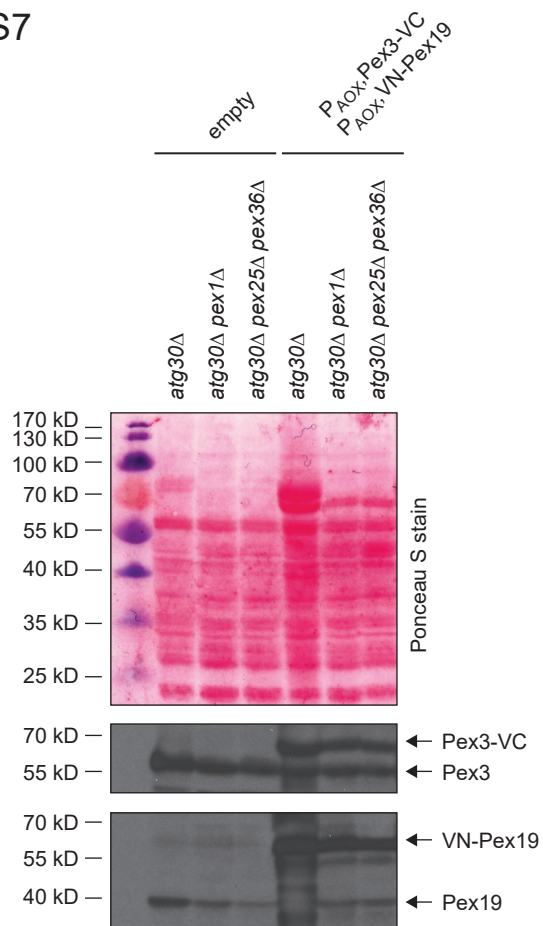

Supplement: NIHMS915847-supplement-Supplemental_Figs.pdf [file NIHMS915847-supplement-Supplemental_Figs.pdf]
